# Supplementary material
Source: PubMed Central journal article supplement (PMC5833609)
Supplement: jamasurg-153-1338-s001.pdf [file jamasurg-153-1338-s001.pdf]

## Supplementary Online Content

Liu JB, Sosa JA, Grogan RH, et al. Variation of thyroidectomy-specific outcomes among hospitals and their association with risk adjustment and hospital performance. *JAMA Surg*. Published online November 29, 2017. doi:10.1001/jamasurg.2017.4593

### **eAppendix.** Additional Methods

#### **eTable 1.** Patient Characteristics by Thyroidectomy-Specific Outcomes

#### **eTable 2.** Odds Ratios of Fixed Effects Included in Hierarchical Models Constructed to Profile Hospitals by Thyroidectomy-Specific Outcomes Without Thyroidectomy-Specific Variables Available

#### **eTable 3.** Model Statistics With and Without Thyroidectomy-Specific Variables Used for Risk Adjustment By Outcome

This supplementary material has been provided by the authors to give readers additional information about their work.

## eAppendix. Additional Methods

The following Common Procedural Terminology (CPT®) codes were used to identify partial, subtotal, and total thyroidectomies in this study for years 2013, 2014, and 2015: 60200, 60210, 60212, 60220, 60225, 60240, 60252, 60254, 60260, 60270, and 60271. These codes were collapsed into categories and used for case-mix adjustment (i.e., “thyroidectomy type”) as follows:

| Thyroidectomy type                                                                   | CPT Codes           |
|--------------------------------------------------------------------------------------|---------------------|
| Partial                                                                              | 60200, 60210, 60220 |
| Total (or subtotal), simple                                                          | 60212, 60225, 60240 |
| Completion                                                                           | 60260               |
| Total (or subtotal) with neck dissection                                             | 60252, 60254        |
| Thyroidectomy, including substernal thyroid; cervical approach                       | 60271               |
| Thyroidectomy, including substernal thyroid; sternal split or transthoracic approach | 60270               |

Following standard ACS-NSQIP definitions, postoperative morbidity occurred if a patient experienced at least one of the following complications: any SSI type, wound disruption, pneumonia, unplanned intubation, prolonged ventilation >48 hours, progressive renal insufficiency, acute renal failure, urinary tract infection, cardiac arrest requiring cardiopulmonary resuscitation, acute myocardial infarction, sepsis, or septic shock. Patients who, at the time of operation, had preoperative SSI, pneumonia, sepsis, or UTI, who were intubated, or who required dialysis, were not counted as having the same occurrence postoperatively, as long as the associated condition was recorded as being present preoperatively.

Readmission, as defined in the ACS-NSQIP, is tracked as readmission to any hospital as recorded in available medical records or reported by physician, patient, caregiver or family; not only readmission to the index hospital nor only hospitals participating in the ACS-NSQIP.

**eTable 1. Patient Characteristics by Thyroidectomy-Specific Outcomes**

|                                 | <b>Total<br/>(n = 14540)</b> | <b>Hypocalcemia (n=430)</b> | <b>RLN Injury (n=755)</b> | <b>Hematoma (n=175)</b> |
|---------------------------------|------------------------------|-----------------------------|---------------------------|-------------------------|
| Age, mean (SD)                  | 52.1 (15.0)                  | 48.3 (15.2)                 | 55.4 (14.8)               | 56.2 (13.8)             |
| Female                          | 11499 (79.1)                 | 374 (87.0)                  | 596 (78.9)                | 124 (70.9)              |
| Race                            |                              |                             |                           |                         |
| African American                | 2344 (16.1)                  | 78 (18.1)                   | 151 (20.0)                | 46 (26.3)               |
| Asian                           | 554 (3.8)                    | 17 (4.0)                    | 42 (5.6)                  | 9 (5.1)                 |
| Caucasian                       | 9876 (67.9)                  | 282 (65.6)                  | 436 (57.7)                | 96 (54.9)               |
| Other                           | 1766 (12.2)                  | 53 (12.3)                   | 126 (16.7)                | 24 (13.7)               |
| Hispanic ethnicity              | 790 (5.4)                    | 28 (6.5)                    | 42 (5.6)                  | 7 (4.0)                 |
| Body mass index class           |                              |                             |                           |                         |
| Underweight                     | 156 (1.1)                    | 4 (0.9)                     | 5 (0.7)                   | 4 (2.3)                 |
| Normal                          | 3545 (24.4)                  | 114 (26.5)                  | 181 (24.0)                | 36 (20.6)               |
| Overweight                      | 4461 (30.7)                  | 110 (25.6)                  | 234 (31.0)                | 45 (25.7)               |
| Class I obesity                 | 3241 (22.3)                  | 93 (21.6)                   | 174 (23.0)                | 43 (24.6)               |
| Class II obesity                | 1695 (11.7)                  | 65 (15.1)                   | 88 (11.7)                 | 21 (12.0)               |
| Class III obesity               | 1442 (9.9)                   | 44 (10.2)                   | 73 (9.7)                  | 26 (14.9)               |
| ASA physical status             |                              |                             |                           |                         |
| 1-2                             | 10016 (68.9)                 | 274 (63.7)                  | 463 (61.3)                | 96 (54.9)               |
| 3                               | 4314 (29.7)                  | 148 (34.4)                  | 278 (36.8)                | 72 (41.1)               |
| 4-5                             | 210 (1.4)                    | 8 (1.9)                     | 14 (1.9)                  | 7 (4.0)                 |
| Not directly admitted from home | 87 (0.6)                     | 9 (2.1)                     | 7 (0.9)                   | 2 (1.1)                 |
| Ventilator dependence           | 28 (0.2)                     | 4 (0.9)                     | 0 (0.0)                   | 2 (1.1)                 |
| COPD                            | 330 (2.3)                    | 10 (2.3)                    | 18 (2.4)                  | 6 (3.4)                 |
| Ascites                         | 8 (0.1)                      | 2 (0.5)                     | 1 (0.1)                   | 0 (0.0)                 |
| CHF                             | 55 (0.4)                     | 4 (0.9)                     | 2 (0.3)                   | 2 (1.1)                 |
| Renal failure                   | 72 (0.5)                     | 10 (2.3)                    | 5 (0.7)                   | 4 (2.3)                 |
| Disseminated cancer             | 120 (0.8)                    | 6 (1.4)                     | 16 (2.1)                  | 3 (1.7)                 |
| Chronic steroids                | 380 (2.6)                    | 16 (3.7)                    | 25 (3.3)                  | 8 (4.6)                 |
| Weight loss                     | 77 (0.5)                     | 4 (0.9)                     | 6 (0.8)                   | 2 (1.1)                 |
| Bleeding disorder               | 158 (1.1)                    | 2 (0.5)                     | 7 (0.9)                   | 7 (4.0)                 |
| Smoking                         | 2122 (14.6)                  | 80 (18.6)                   | 120 (15.9)                | 25 (14.3)               |
| Hypertension                    | 5566 (38.3)                  | 153 (35.6)                  | 336 (44.5)                | 77 (44.0)               |
| Diabetes                        |                              |                             |                           |                         |
| Oral                            | 1300 (8.9)                   | 28 (6.5)                    | 69 (9.1)                  | 17 (9.7)                |
| Insulin                         | 645 (4.4)                    | 16 (3.7)                    | 39 (5.2)                  | 10 (5.7)                |
| Dyspnea                         | 875 (6.0)                    | 39 (9.1)                    | 60 (7.9)                  | 20 (11.4)               |
| Dependent functional status     | 82 (0.6)                     | 5 (1.2)                     | 4 (0.5)                   | 3 (1.7)                 |
| Preoperative SIRS/sepsis        | 60 (0.4)                     | 9 (2.1)                     | 6 (0.8)                   | 2 (1.1)                 |
| Emergency                       | 32 (0.2)                     | 2 (0.5)                     | 1 (0.1)                   | 0 (0.0)                 |
| Outpatient                      | 8487 (58.4)                  | 182 (42.3)                  | 390 (51.7)                | 67 (38.3)               |
| Indication                      |                              |                             |                           |                         |

|                                           |              |            |            |            |
|-------------------------------------------|--------------|------------|------------|------------|
| Single nodule                             | 5062 (34.8)  | 84 (19.5)  | 194 (25.7) | 58 (33.1)  |
| Multinodular goiter                       | 6196 (42.6)  | 186 (43.3) | 327 (43.3) | 71 (40.6)  |
| Graves' disease                           | 906 (6.2)    | 58 (13.5)  | 50 (6.6)   | 12 (6.9)   |
| Differentiated malignancy                 | 1761 (12.1)  | 83 (19.3)  | 150 (19.9) | 23 (13.1)  |
| Poorly differentiated or other malignancy | 167 (1.2)    | 7 (1.6)    | 7 (0.9)    | 4 (2.3)    |
| Other                                     | 448 (3.1)    | 12 (2.8)   | 27 (3.6)   | 7 (4.0)    |
| Clinical toxicity                         | 1138 (7.8)   | 54 (12.6)  | 74 (9.8)   | 21 (12.0)  |
| Previous neck surgery                     | 1575 (10.8)  | 44 (10.2)  | 106 (14.0) | 25 (14.3)  |
| Minimally-invasive approach               | 117 (0.8)    | 2 (0.5)    | 9 (1.2)    | 0 (0.0)    |
| Central neck dissection performed         | 3789 (26.1)  | 161 (37.4) | 189 (25.0) | 47 (26.9)  |
| Neoplasm                                  | 8242 (56.7)  | 272 (63.3) | 472 (62.5) | 94 (53.7)  |
| Pathologic T classification               |              |            |            |            |
| N/A                                       | 8408 (57.8)  | 196 (45.6) | 383 (50.7) | 106 (60.6) |
| x                                         | 252 (1.7)    | 10 (2.3)   | 9 (1.2)    | 0 (0.0)    |
| 0                                         | 207 (1.4)    | 5 (1.2)    | 11 (1.5)   | 3 (1.7)    |
| 1                                         | 3403 (23.4)  | 125 (29.1) | 188 (24.9) | 36 (20.6)  |
| 2                                         | 883 (6.1)    | 25 (5.8)   | 45 (6.0)   | 4 (2.3)    |
| 3                                         | 1262 (8.7)   | 60 (14.0)  | 94 (12.5)  | 23 (13.1)  |
| 4                                         | 125 (0.9)    | 9 (2.1)    | 25 (3.3)   | 3 (1.7)    |
| Multifocal                                |              |            |            |            |
| Unilateral                                | 1043 (7.2)   | 35 (8.1)   | 60 (7.9)   | 13 (7.4)   |
| Bilateral                                 | 1324 (9.1)   | 74 (17.2)  | 95 (12.6)  | 18 (10.3)  |
| Pathologic N classification               |              |            |            |            |
| N/A                                       | 8710 (59.9)  | 199 (46.3) | 395 (52.3) | 107 (61.1) |
| x                                         | 2474 (17.0)  | 80 (18.6)  | 137 (18.1) | 28 (16.0)  |
| 0                                         | 2110 (14.5)  | 73 (17.0)  | 114 (15.1) | 19 (10.9)  |
| 1                                         | 1246 (8.6)   | 78 (18.1)  | 109 (14.4) | 21 (12.0)  |
| Pathologic M classification               |              |            |            |            |
| N/A                                       | 10937 (75.2) | 274 (63.7) | 504 (66.8) | 126 (72.0) |
| 1                                         | 61 (0.4)     | 2 (0.5)    | 8 (1.1)    | 2 (1.1)    |
| Thyroidectomy                             |              |            |            |            |
| Partial                                   | 5154 (35.5)  | 28 (6.5)   | 190 (25.2) | 52 (29.7)  |
| Total (or subtotal), simple               | 6151 (42.3)  | 269 (62.6) | 338 (44.8) | 82 (46.9)  |
| Completion                                | 709 (4.9)    | 18 (4.2)   | 51 (6.8)   | 13 (7.4)   |
| Total (or subtotal), neck dissection      | 1872 (12.9)  | 95 (22.1)  | 121 (16.0) | 24 (13.7)  |
| Substernal goiter, cervical               | 587 (4.0)    | 17 (4.0)   | 50 (6.6)   | 3 (1.7)    |
| Substernal goiter, thoracic               | 67 (0.5)     | 3 (0.7)    | 5 (0.7)    | 1 (0.6)    |
| Parathyroid autotransplantation           | 1316 (9.1)   | 59 (13.7)  | 96 (12.7)  | 15 (8.6)   |

RLN: recurrent laryngeal nerve; ASA: American Society of Anesthesiologists; COPD: chronic obstructive pulmonary disease; CHF; congestive heart failure; SIRS: systemic inflammatory response syndrome; TNM refers to AJCC 7<sup>th</sup> ed. tumor classification.  
All values are expressed as N (%) unless otherwise noted.

**eTable 2.** Odds Ratios of Fixed Effects Included in Hierarchical Models Constructed to Profile Hospitals by Thyroidectomy-Specific Outcomes Without Thyroidectomy-Specific Variables Available

| Hypocalcemia |                                      |                   | RLN Injury |                                      |                  | Hematoma |                             |                   |
|--------------|--------------------------------------|-------------------|------------|--------------------------------------|------------------|----------|-----------------------------|-------------------|
| Step*        | Variable                             | OR (95% CI)       | Step*      | Variable                             | OR (95% CI)      | Step*    | Variable                    | OR (95% CI)       |
| 1            | Thyroidectomy type                   |                   | 1          | Race                                 |                  | 1        | Outpatient                  | 0.44 (0.31-0.63)  |
|              | Partial                              | 0.18 (0.12-0.28)  |            | Caucasian                            | Ref              | 2        | ASA class                   |                   |
|              | Total (or subtotal), simple          | Ref               |            | Asian                                | 1.63 (1.14-2.33) |          | 1-2                         | Ref               |
|              | Completion                           | 0.49 (0.29-0.83)  |            | African American                     | 1.40 (1.13-1.74) |          | 3                           | 1.33 (0.95-1.87)  |
|              | Total (or subtotal), neck dissection | 0.77 (0.48-1.22)  |            | Other/Unknown                        | 1.21 (0.88-1.68) |          | 4+                          | 1.96 (0.84-4.55)  |
|              | Substernal goiter, cervical          | 0.60 (0.35-1.03)  | 2          | Age                                  | 1.02 (1.01-1.02) | 3        | Race                        |                   |
|              | Substernal goiter, thoracic          | 0.37 (0.10-1.39)  | 3          | Work RVUs                            | 1.05 (1.01-1.10) |          | Caucasian                   | Ref               |
| 2            | Alkaline phosphatase >125 IU/L       | 2.54 (1.72-3.76)  | 4          | Disseminated cancer                  | 2.41 (1.37-4.25) |          | Asian                       | 1.82 (0.90-3.69)  |
| 3            | Age                                  | 0.98 (0.98-0.99)  | 5          | Hispanic ethnicity                   |                  |          | African American            | 2.04 (1.40-2.95)  |
| 4            | Renal failure                        | 5.38 (2.52-11.47) |            | No                                   | Ref              |          | Other/Unknown               | 1.34 (0.82-2.18)  |
| 5            | SIRS/Sepsis                          | 3.81 (1.61-9.03)  |            | Yes                                  | 1.20 (0.83-1.73) | 4        | Hematocrit >45              | 2.02 (1.28-3.20)  |
| 6            | Outpatient                           | 0.44 (0.35-0.57)  |            | Unknown                              | 0.85 (0.60-1.21) | 5        | Age                         | 1.01 (1.00-1.02)  |
| 7            | Female                               | 1.85 (1.37-2.50)  | 6          | Thyroidectomy type                   |                  | 6        | Bleeding disorder†          | 2.48 (1.10-5.62)  |
| 8            | Not admitted from home               | 2.82 (1.20-6.62)  |            | Partial                              | Ref              | 7        | Wound classification        |                   |
| 9            | Dyspnea                              | 1.41 (0.97-2.04)  |            | Total (or subtotal), simple          | 1.37 (1.08-1.75) |          | Clean or clean contaminated | Ref               |
| 10           | Work RVU                             | 1.08 (1.03-1.14)  |            | Completion                           | 1.35 (0.88-2.08) |          | Contaminated or dirty       | 4.43 (1.01-19.46) |
|              |                                      |                   |            | Total (or subtotal), neck dissection | 1.16 (0.69-1.96) |          |                             |                   |
|              |                                      |                   |            | Substernal goiter, cervical          | 1.76 (1.15-2.68) |          |                             |                   |
|              |                                      |                   |            | Substernal goiter, thoracic          | 1.10 (0.38-3.24) |          |                             |                   |

RLN: recurrent laryngeal nerve; SIRS: systemic inflammatory response syndrome; ASA: American Society of Anesthesiologists

\* Steps represent point when variable is selected in a logistic, forward stepwise regression process (entrance criteria,  $p < 0.05$ ). Only standard ACS NSQIP variables were available for selection. Selected variables are subsequently included as fixed effects for risk adjustment when evaluating hospital performance for each outcome studied.

† A preoperative bleeding disorder is present in patients with an underlying hematologic disorder (e.g., hemophilia) or on chronic anticoagulation (e.g., warfarin).

**eTable 3. Model Statistics With and Without Thyroidectomy-Specific Variables Used for Risk Adjustment By Outcome**

| Outcome                          | C-statistic |         | Hosmer-Lemeshow test statistic ( $p$ value) |              | Brier score |         |
|----------------------------------|-------------|---------|---------------------------------------------|--------------|-------------|---------|
|                                  | With        | Without | With                                        | Without      | With        | Without |
| Hypocalcemia                     | 0.817       | 0.814   | 6.92 (0.54)                                 | 5.92 (0.66)  | 0.029       | 0.029   |
| Recurrent Laryngeal Nerve Injury | 0.772       | 0.765   | 13.26 (0.10)                                | 18.69 (0.02) | 0.050       | 0.050   |
| Hematoma                         | 0.704       | 0.704   | 8.97 (0.34)                                 | 8.97 (0.34)  | 0.013       | 0.013   |
| Morbidity                        | 0.811       | 0.804   | 8.82 (0.36)                                 | 12.71 (0.12) | 0.013       | 0.013   |
| Surgical Site Infection          | 0.840       | 0.836   | 12.34 (0.14)                                | 12.74 (0.12) | 0.004       | 0.004   |
| Readmission                      | 0.706       | 0.683   | 18.72 (0.02)                                | 10.59 (0.23) | 0.024       | 0.024   |

The C-statistic is used to assess discrimination, which represents the probability that an individual who experienced the event had a higher model-assigned risk than an individual who did not. The C-statistic ranges from 0.5 (discrimination equal to chance) to 1.0 (perfect discrimination).

The Hosmer-Lemeshow test assesses calibration, which refers to the agreement between observed and predicted outcomes and the consistency of that agreement across the range of predicted risk. A non-significant test reflects adequate calibration. It utilizes a  $\chi^2$ -test statistic and is thus dependent on sample size – larger samples sizes will result in statistical significance.

The Brier score assesses model accuracy, or discrimination and calibration simultaneously. The Brier score is the average squared difference between the patient's predicted probability for the event and the observed event (0 or 1, for non-event and event, respectively). Values closer to 0 reflect improved model specification.
